# Supplementary material for: Self-assembled supramolecular nanoparticles mediated by host–guest interactions for photodynamic therapy
Source: Royal Society of Chemistry journal article supplement (doi:10.1039/c3ra48064j), 2014-01-01

## Supplementary Information

### Self-Assembled Supramolecular Nanoparticles Mediated by Host–Guest Interactions for Photodynamic Therapy

Hong Yan, <sup>a</sup> Xiaoyong Pan, <sup>a</sup> Ming Hui Chua, <sup>a</sup> Xiaobai Wang, <sup>a</sup> Jing Song, <sup>a</sup> Qun Ye, <sup>a</sup> Hui Zhou, <sup>a</sup> Angeline TAN Yan Xuan, <sup>a</sup> Ye Liu <sup>a</sup> and Jianwei Xu<sup>\*a,b</sup>

<sup>a</sup> Institute of Materials Research and Engineering (IMRE), Agency for Science, Technology and Research (A\*STAR), 3 Research Link, 11760, Republic of Singapore. E-mail: jw-xu@imre.a-star.edu.sg

<sup>b</sup> Department of Chemistry, National University of Singapore, 3 Science Drive 3, Singapore 117543, Republic of Singapore

#### S1. Additional Experimental Data:

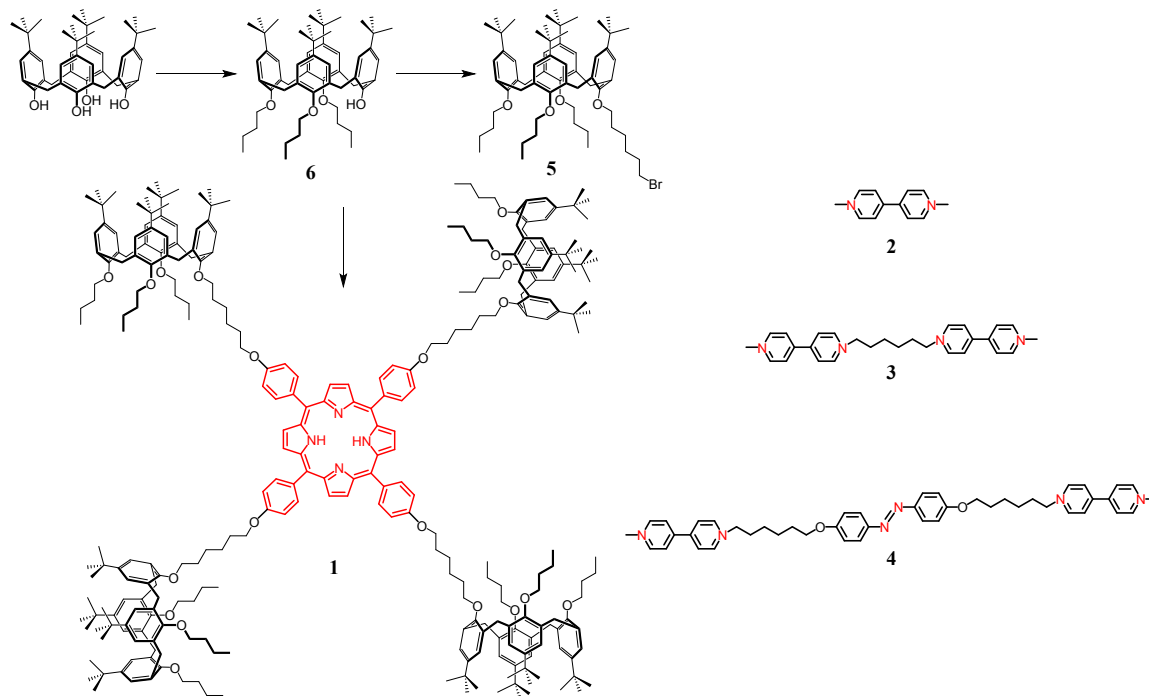

**Scheme 1.** A schematic illustration for the synthesis of calix[4]arene-containing tetrameric porphyrin derivative and different length of biviologen derivatives.

*Synthesis of intermediate compound 5:* compound **6** (3.1 g, 3.8 mmol), NaH (0.9 g, 38.0 mmol), and 1,6-Dibromohexane (9.3 g, 38.0 mmol) were dissolved/suspended in dry DMF (30 mL) under N<sub>2</sub>,

and the mixture solution was stirred at 50 °C overnight. After filtration, the solvent was removed under a reduced pressure. The residue was taken up in H<sub>2</sub>O and washed by CH<sub>2</sub>Cl<sub>2</sub>. After removing the solvent, the residue was purified by column chromatography (CH<sub>2</sub>Cl<sub>2</sub> : Hexane = 2 : 1 as eluent) to provide **5** (3.3 g, 88%) as a white solid. <sup>1</sup>H NMR (400 MHz, CDCl<sub>3</sub>, δ): 6.79 (s, 4H, Ar H), 6.76 (s, 4H, Ar H), 4.44 (dd, *J* = 12.4 & 4.6 Hz, 4H; CH<sub>2</sub>), 3.85 (m, 8H; CH<sub>2</sub>), 3.43 (m, 6H; CH<sub>2</sub>), 3.10 (d, *J* = 12.5 Hz, 4H; CH<sub>2</sub>), 2.01 (m, 8H; CH<sub>2</sub>), 1.09 (m, 6H; CH<sub>2</sub>), 1.46 (m, 12H; CH<sub>2</sub>), 1.09 (s, 18H; CH<sub>3</sub>), 1.07 (m, 18H; CH<sub>3</sub>), 1.02 (t, *J* = 7.4 Hz, 9H; CH<sub>3</sub>); <sup>13</sup>C NMR (100 MHz, CDCl<sub>3</sub>, δ): 153.7, 144.2, 133.9, 133.8, 133.7, 124.93, 124.89, 124.83, 75.2, 33.82, 33.80, 33.77, 33.00, 32.44, 32.40, 31.48, 31.46, 31.09, 31.06, 30.1, 28.4, 25.4, 19.4, 14.2; HRMS (ESI, *m/z*): [*M* + H]<sup>+</sup> calcd for C<sub>62</sub>H<sub>92</sub>O<sub>4</sub>Br: 979.6179; found, 979.6182.

*Synthesis of calix[4]arene-containing tetrameric porphyrin derivative 1:* Compound **5** (1.22 g, 1.25 mmol), 5,10,15,20-Tetrakis(4-hydroxyphenyl)porphyrin **7** (170 mg, 0.25 mmol) and K<sub>2</sub>CO<sub>3</sub> (0.69 g, 0.50 mmol) were dissolved/suspended in dry DMF (30 mL) under N<sub>2</sub>. And the mixture solution was stirred at 100 °C for 36 hours. After filtration, the solvent was removed under a reduced pressure. The residue was taken up in H<sub>2</sub>O and washed by CH<sub>2</sub>Cl<sub>2</sub>. After removing the solvent, the residue was purified by column chromatography (silica gel, Ethyl acetate : Hexane = 2 : 1 as eluent) to provide **1** (0.14 g, 13%) as a red solid. **1**: <sup>1</sup>H NMR (400 MHz, CDCl<sub>3</sub>, δ): 8.89 (s, 8H, Ar H), 8.14 (d, *J* = 7.5 Hz, 8H, Ar H), 7.39 (d, *J* = 8.3 Hz, 8H, Ar H), 6.88 (s, 16H, Ar H), 6.86 (s, 16H, Ar H), 4.45 (dd, *J* = 12.4 & 1.6 Hz, 16H; CH<sub>2</sub>), 3.88 (m, 32H; CH<sub>2</sub>), 3.55 (m, 8H; CH<sub>2</sub>), 3.15 (d, *J* = 12.4 Hz, 16H; CH<sub>2</sub>), 1.95 (m, 40H; CH<sub>2</sub>), 1.49 (m, 42H; CH<sub>2</sub>), 1.06 (m, 144H; CH<sub>2</sub>), 1.04 (m, 36H; CH<sub>3</sub>).

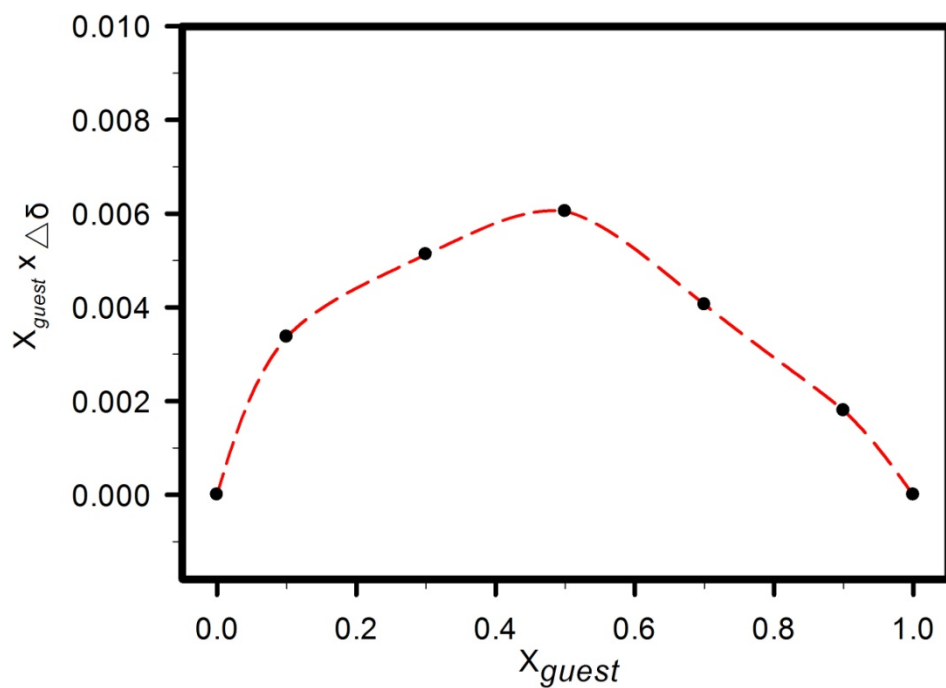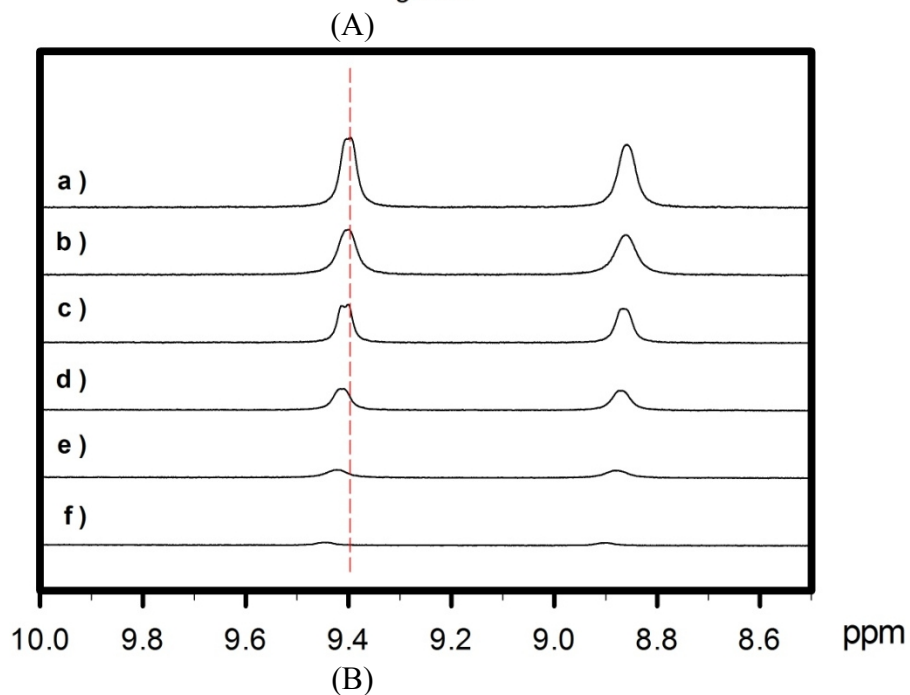

**Figure S1.** (A) Job plot between mono-calix[4]arene **5** and biviologen derivative **2** collected by plotting the  $\Delta\delta$  in chemical shift of the viologen derivatives proton  $H_a$ , which was observed by (B)  $^1H$  NMR spectroscopy (Acetone- $d_6$ ) against the change in the mole fraction of the guest ( $X_{guest}$ : a) 100 %; b) 90 %; c) 70 %; d) 50 %; e) 30 %; f) 10 %). [Host] and [Guest] are concentrations of host molecule **5** and viologen derivatives **2**, respectively. The total concentration of host and guest molecules was kept at 20.0 mM in this titration ( [Host]+[Guest]=20.0 mM).

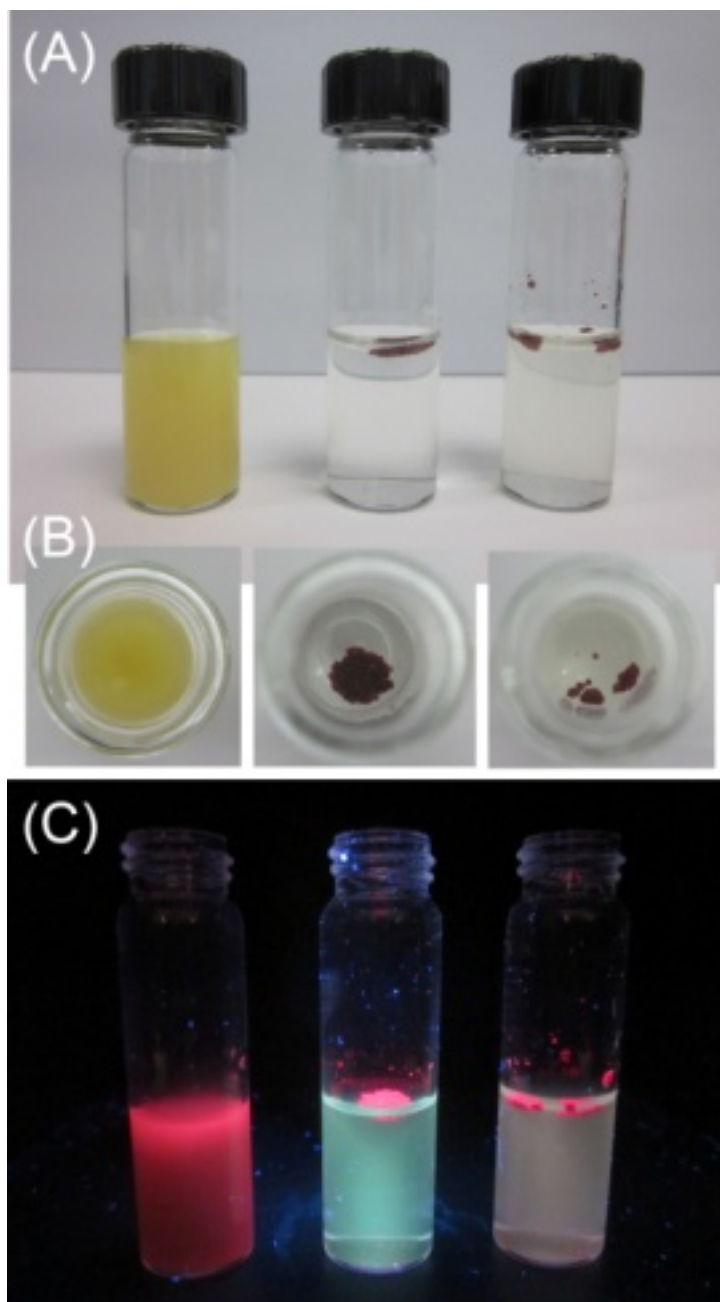

**Figure S2.** The photographs show visible color (A) and visual fluorescence color (B) changes of the sample solutions after 0.5 mL solution of complexation of host-guest in acetone was then emulsified with 2 mL of water (Right: G1; Middle: G2; Left: G3). The photographs were taken by illuminating the samples with a 365 nm handheld UV lamp.



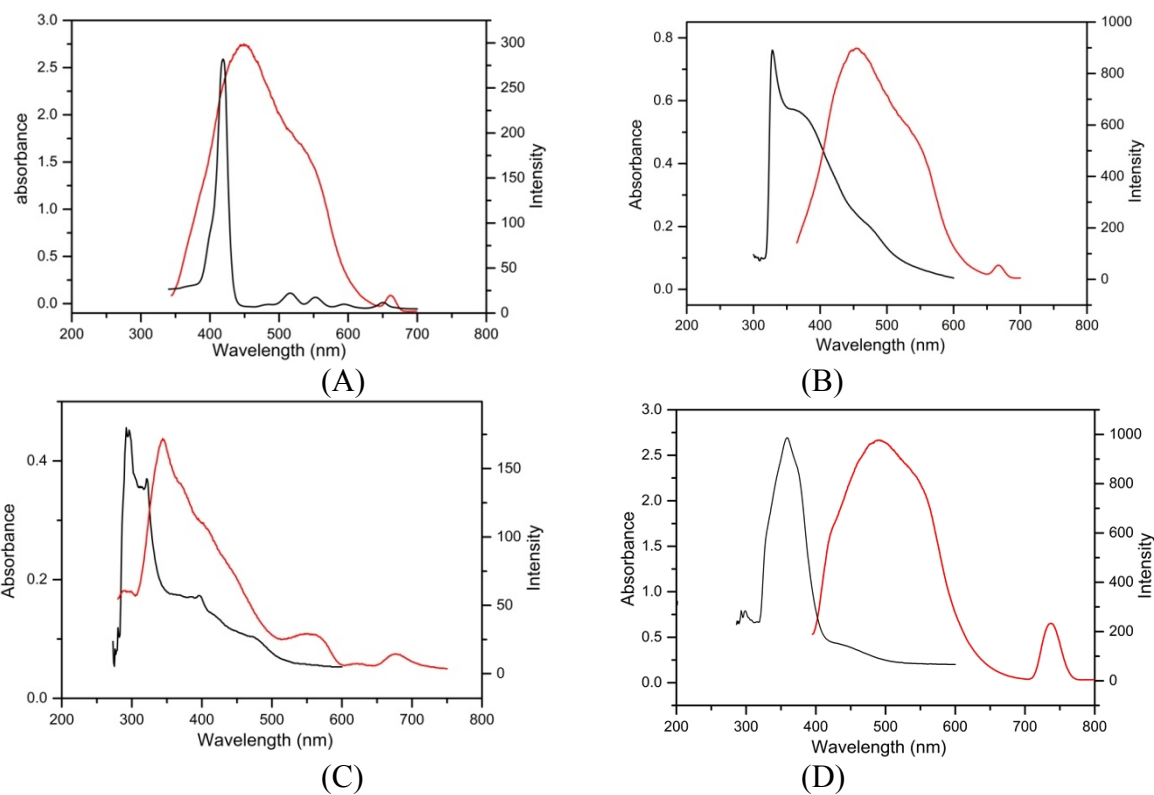

**Figure S3.** UV-Vis (black line) and fluorescence (red line) spectra of (A) 1, (B) 2, (C) 3 and (D) 4. The photographs show visible color (A) and visual fluorescence color (B) changes of the sample solutions after 0.5 mL solution of complexation of host-guest in acetone was then emulsified with 2 mL of water (Right: G1; Middle: G2; Left: G3).

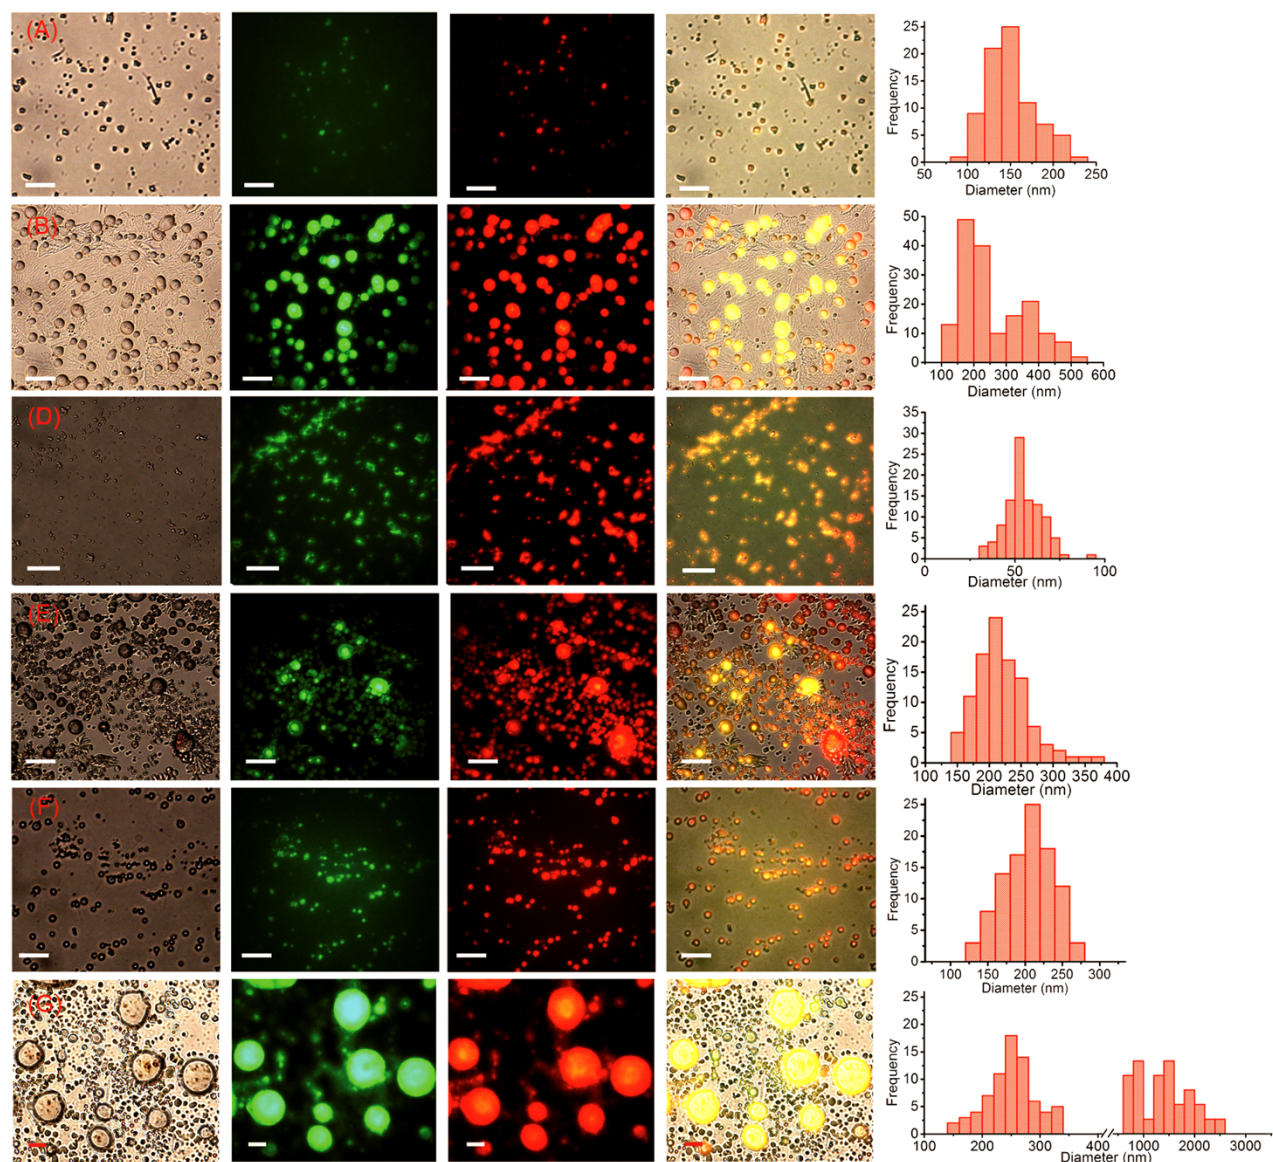

**Figure S4.** Fluorescence microscopy images of the particulate entities originated by (A) ~ (B) G1, (C) ~ (D) G2 and (E) ~ (F) G3, through method I at total molar concentration 0.2 mM (A, C and E) and 2 mM (B, D and F). Left to right is bright-field, green channel, red channel, merged layer and particle size distribution. The scale bar is 1  $\mu\text{m}$ .

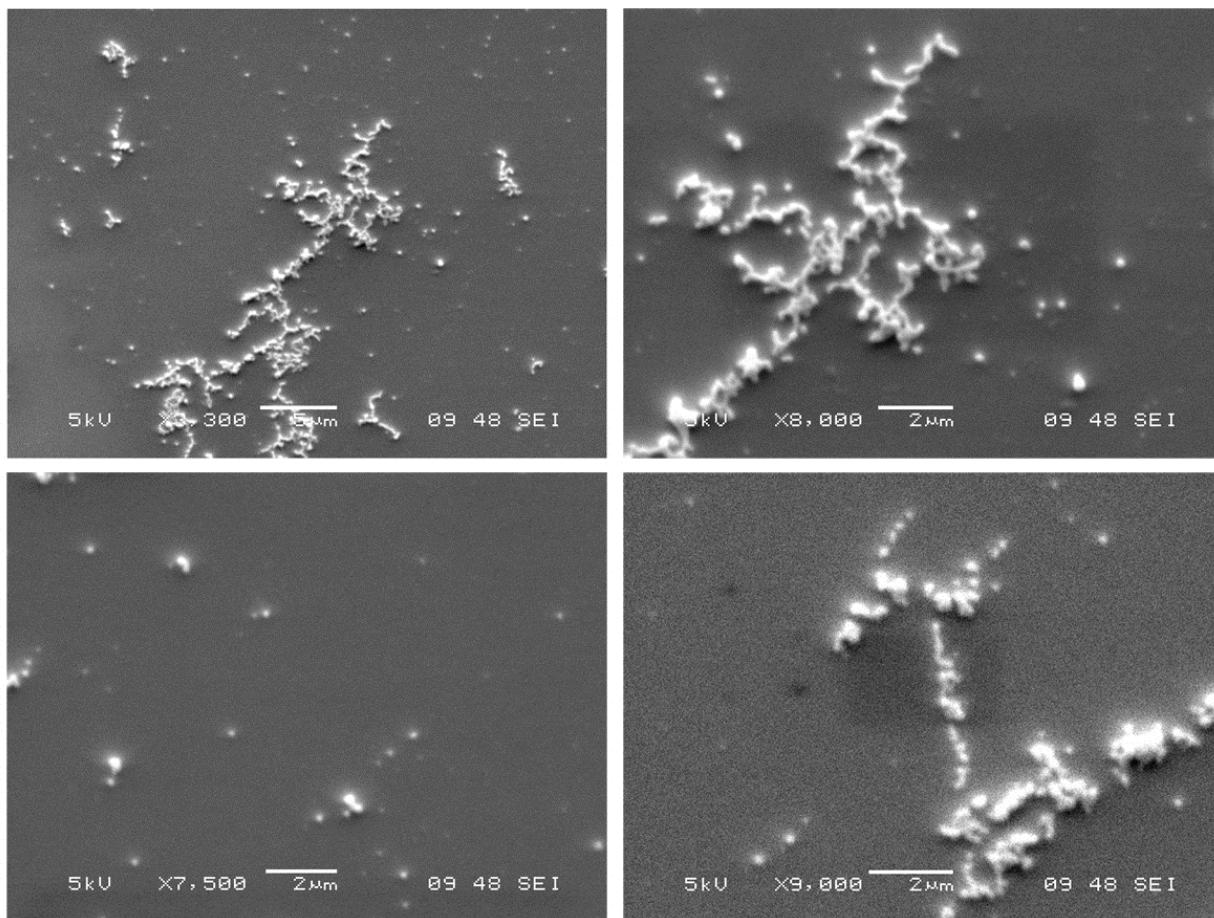

**Figure S5.** SEM images of the particulate entities originated by G3 through method II at total molar concentration 2 mM.



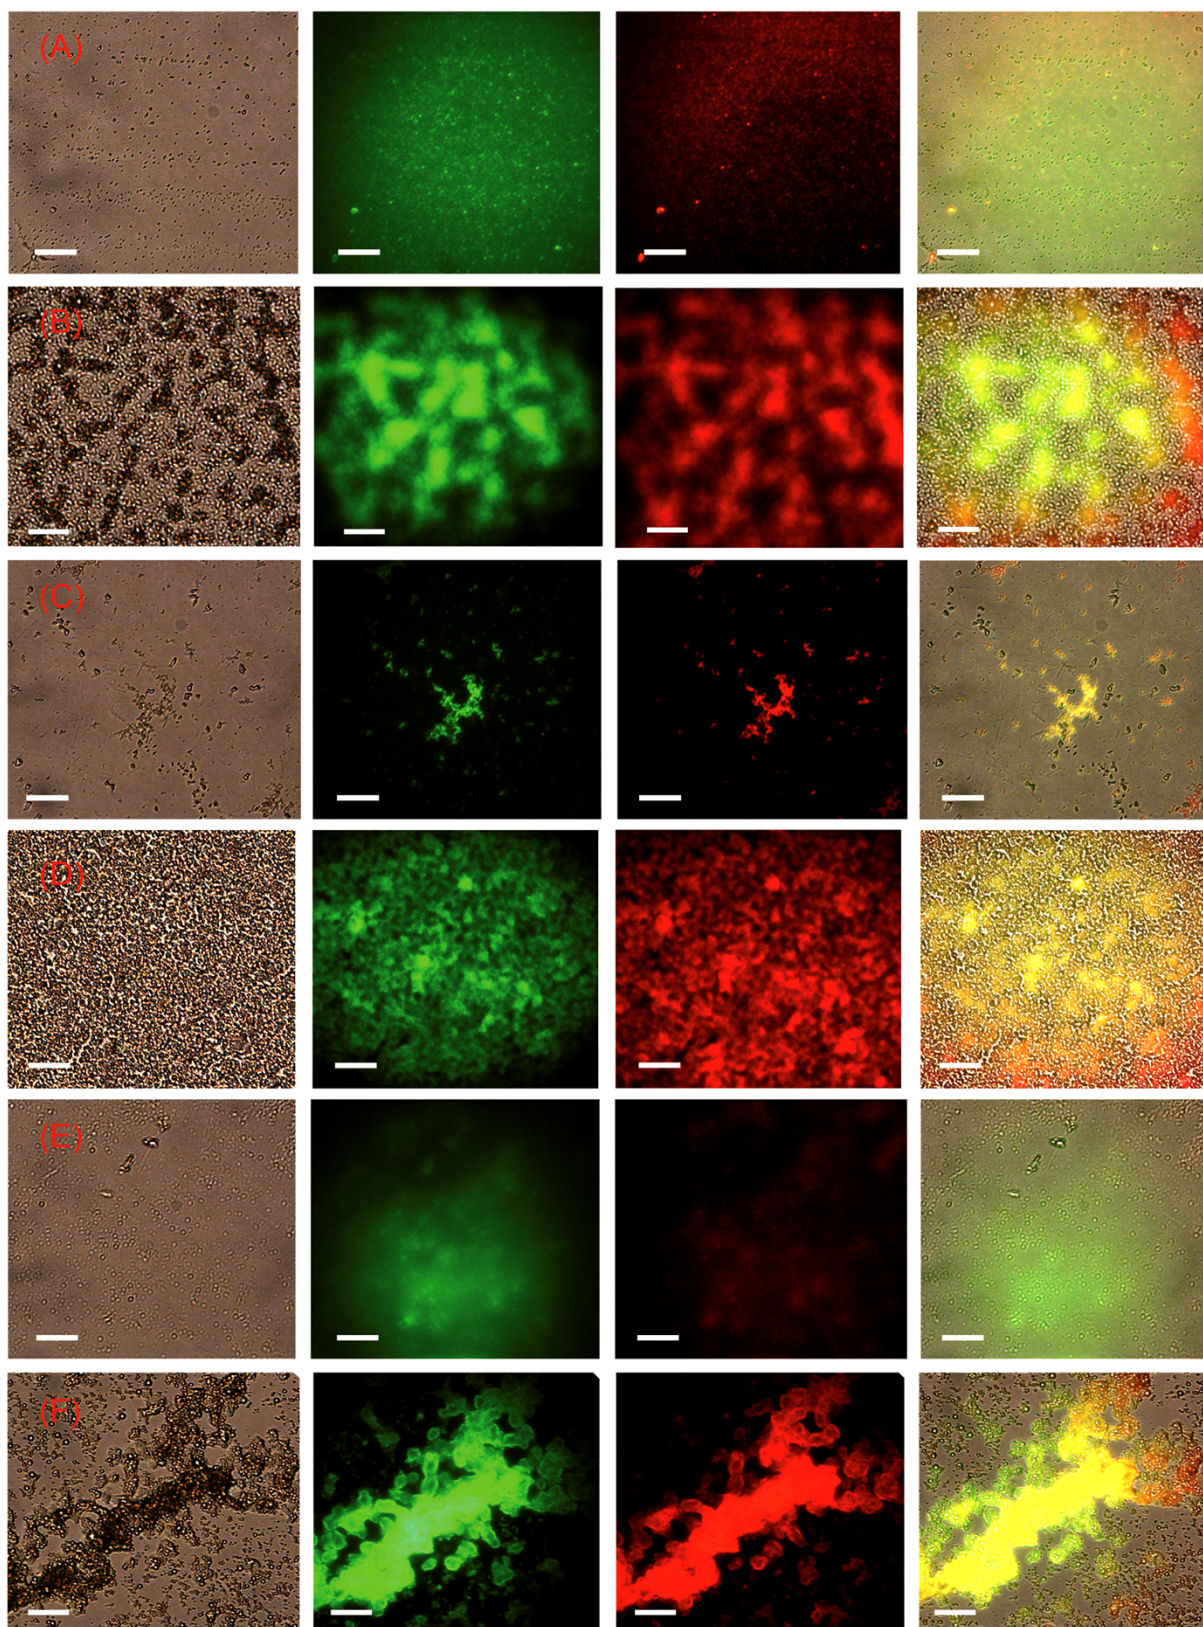

**Figure S6.** Fluorescence microscopy images of the particulate entities originated by (A) ~ (B) G1, (C) ~ (D) G2 and (E) ~ (F) G3, through method II at total molar concentration 0.2 mM (A, C and E) and 2 mM (B, D and F). Left to right is bright-field, green channel, red channel, and merged layer. The scale bar is 1  $\mu\text{m}$ .



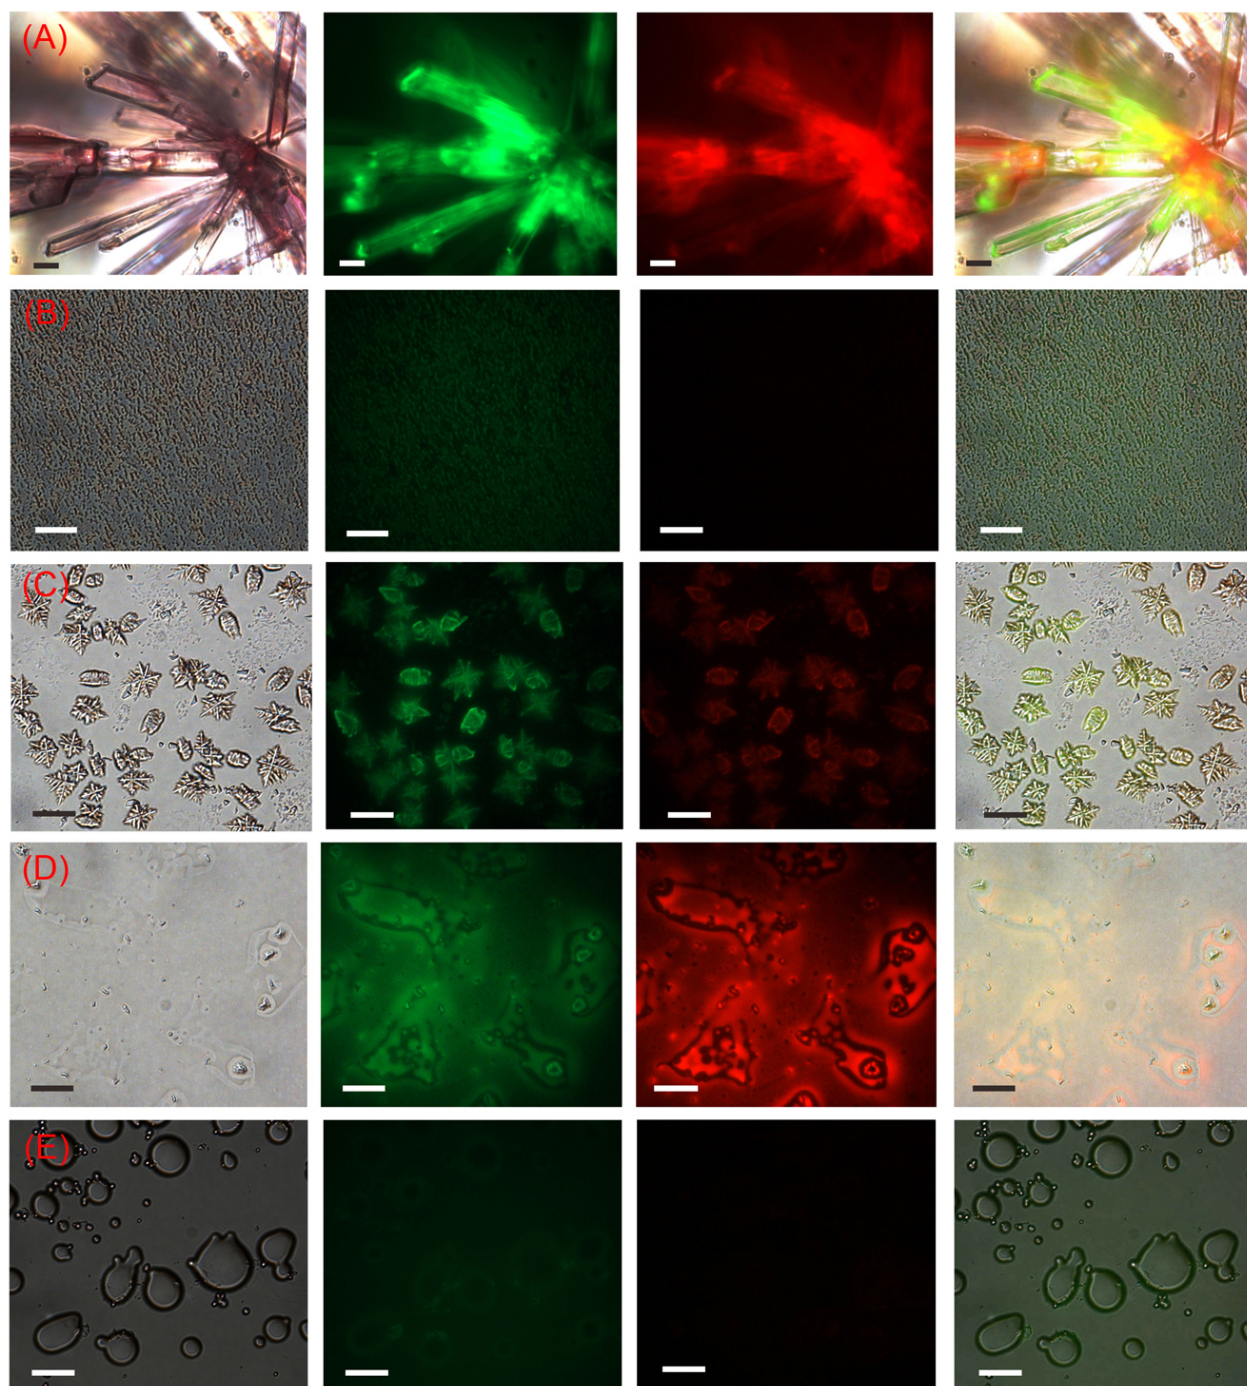

**Figure S7.** Fluorescence microscopy images of the morphologies originated by drop coating of (A) 1, (B) 2, (C) 3, (D) 4 and 5 on the glass slide at molar concentration 2 mM. Left to right is bright-field, green channel, red channel, and merged layer. The scale bar is 1  $\mu\text{m}$ .

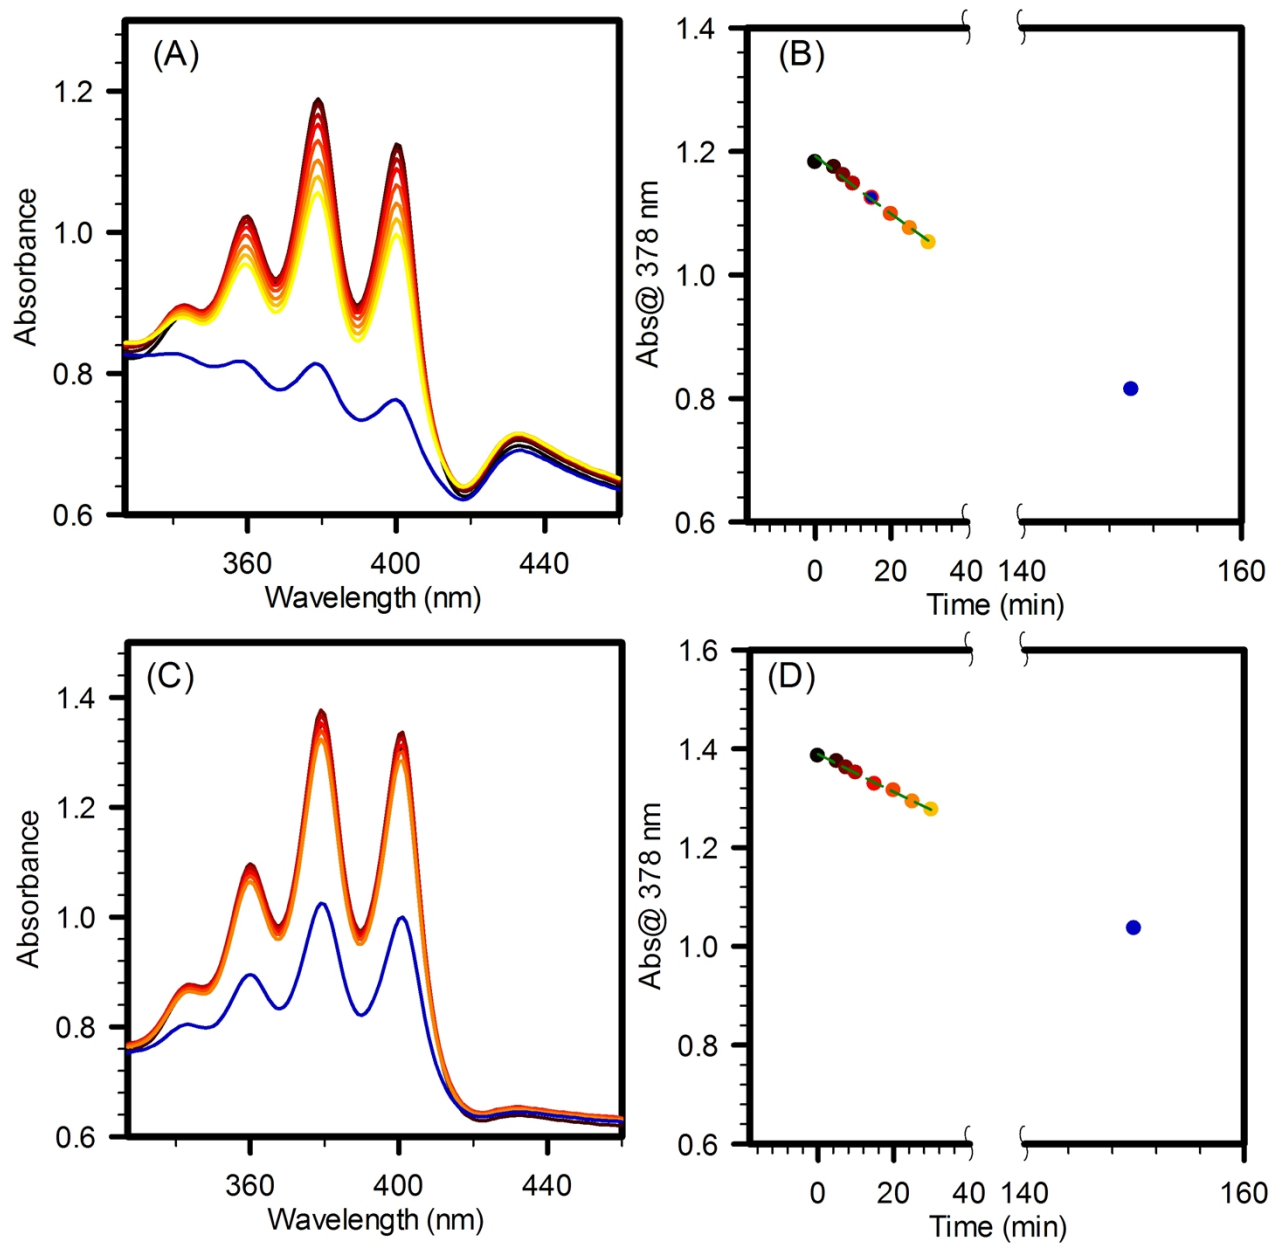

**Figure S8.** UV-Vis spectral changes of the ABDA in the presence of SNPs (G3) (A) and the same concentration of 5,10,15,20-Tetrakis(4-hydroxyphenyl)porphyrin 7 (C) suspension under illumination by a 633 nm laser for 2.5 h. (B, D) show the absorbance changes at 378 nm.

**Table S1. Summary of particle sizes observed by dynamic light scattering through method II**

|    | Total Molar Concentration |                 |                 |
|----|---------------------------|-----------------|-----------------|
|    | 0.2 mM                    | 2 mM            | 20 mM           |
| G1 | 163.3 ± 75 nm             | 150 ± 66.1 nm   | 186.2 ± 76.7 nm |
| G2 | 170.9 ± 77.7 nm           | 188.0 ± 81.1 nm | 195.7 ± 98 nm   |
| G3 | 115.4 ± 45.5 nm           | 280.7 ± 67.5 nm | 376.4 ± 97.8 nm |

#### S4. Characterization Spectra (<sup>1</sup>H and <sup>13</sup>C NMR and MS) of Compounds

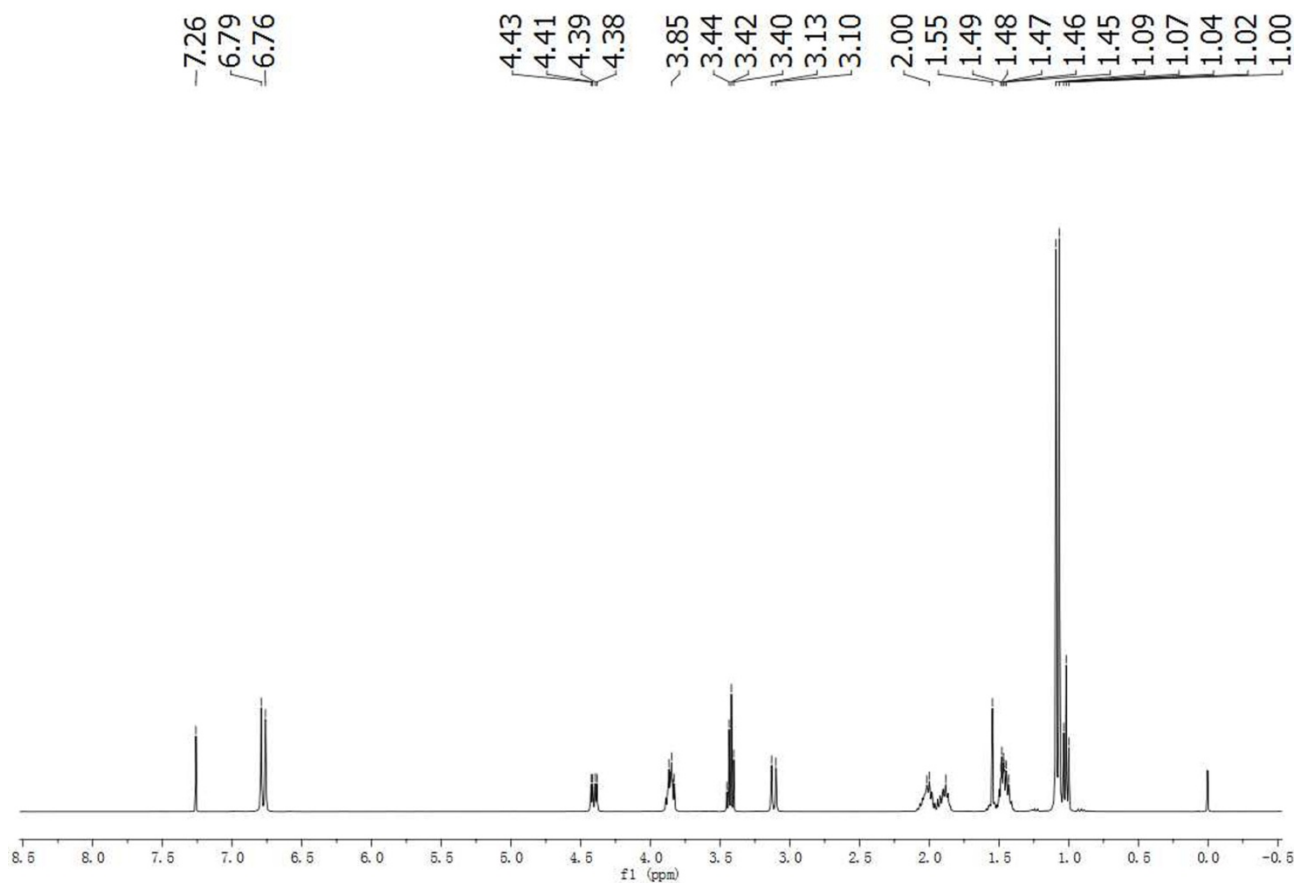

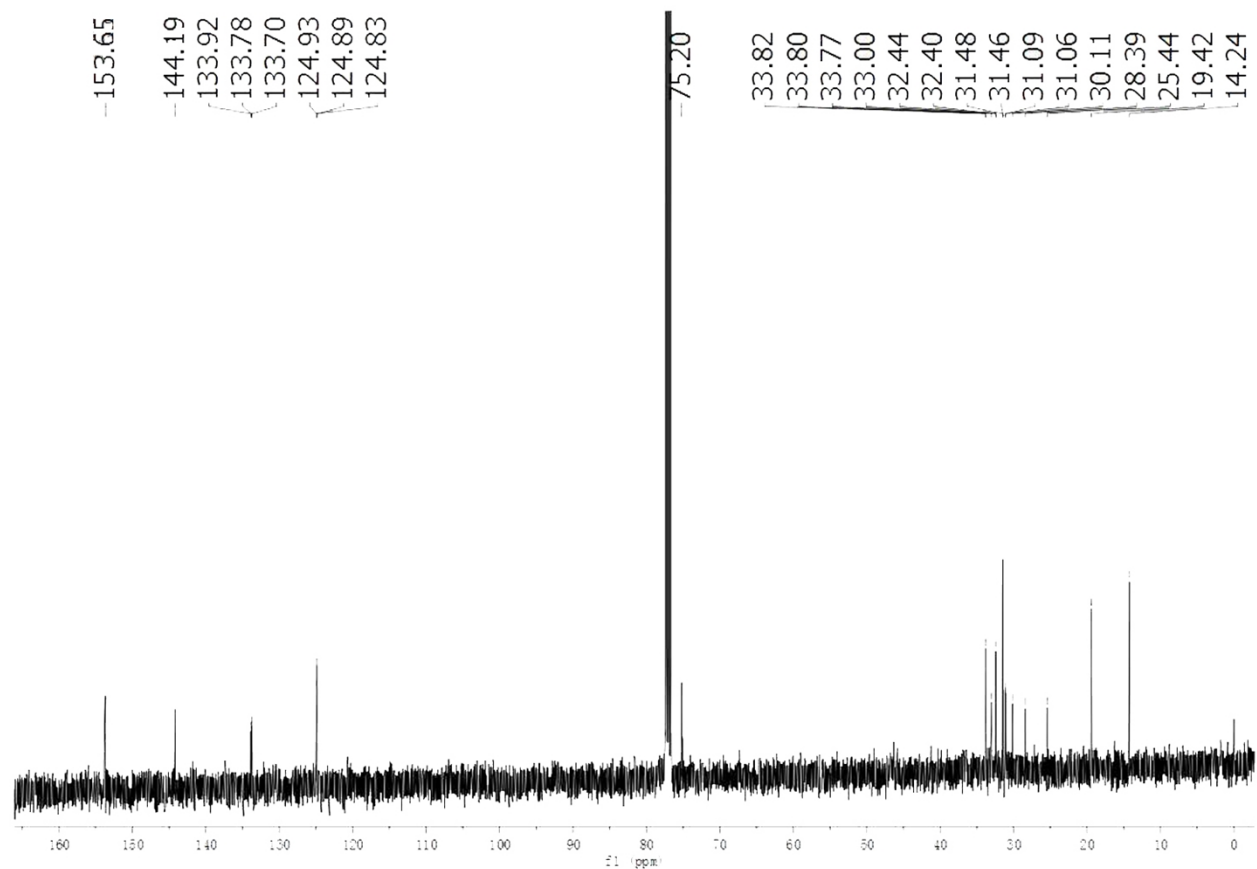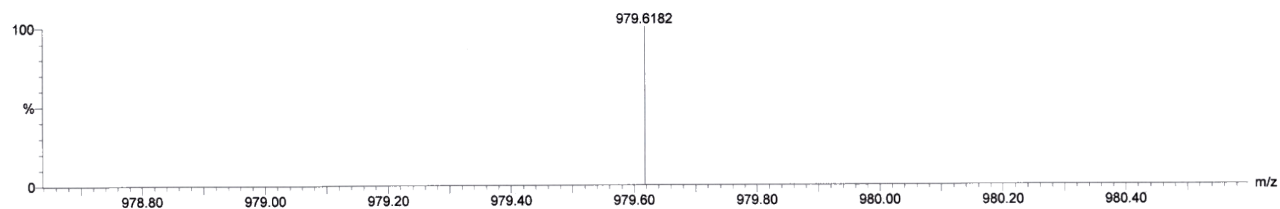

|          |            |     |     |       |       |              |                 |
|----------|------------|-----|-----|-------|-------|--------------|-----------------|
| Minimum: |            |     |     | -1.5  |       |              |                 |
| Maximum: | 5.0        | 5.0 |     | 100.0 |       |              |                 |
| Mass     | Calc. Mass | mDa | PPM | DBE   | i-FIT | i-FIT (Norm) | Formula         |
| 979.6182 | 979.6179   | 0.3 | 0.3 | 16.5  | 22.4  | 0.0          | C62 H92 O4 79Br |



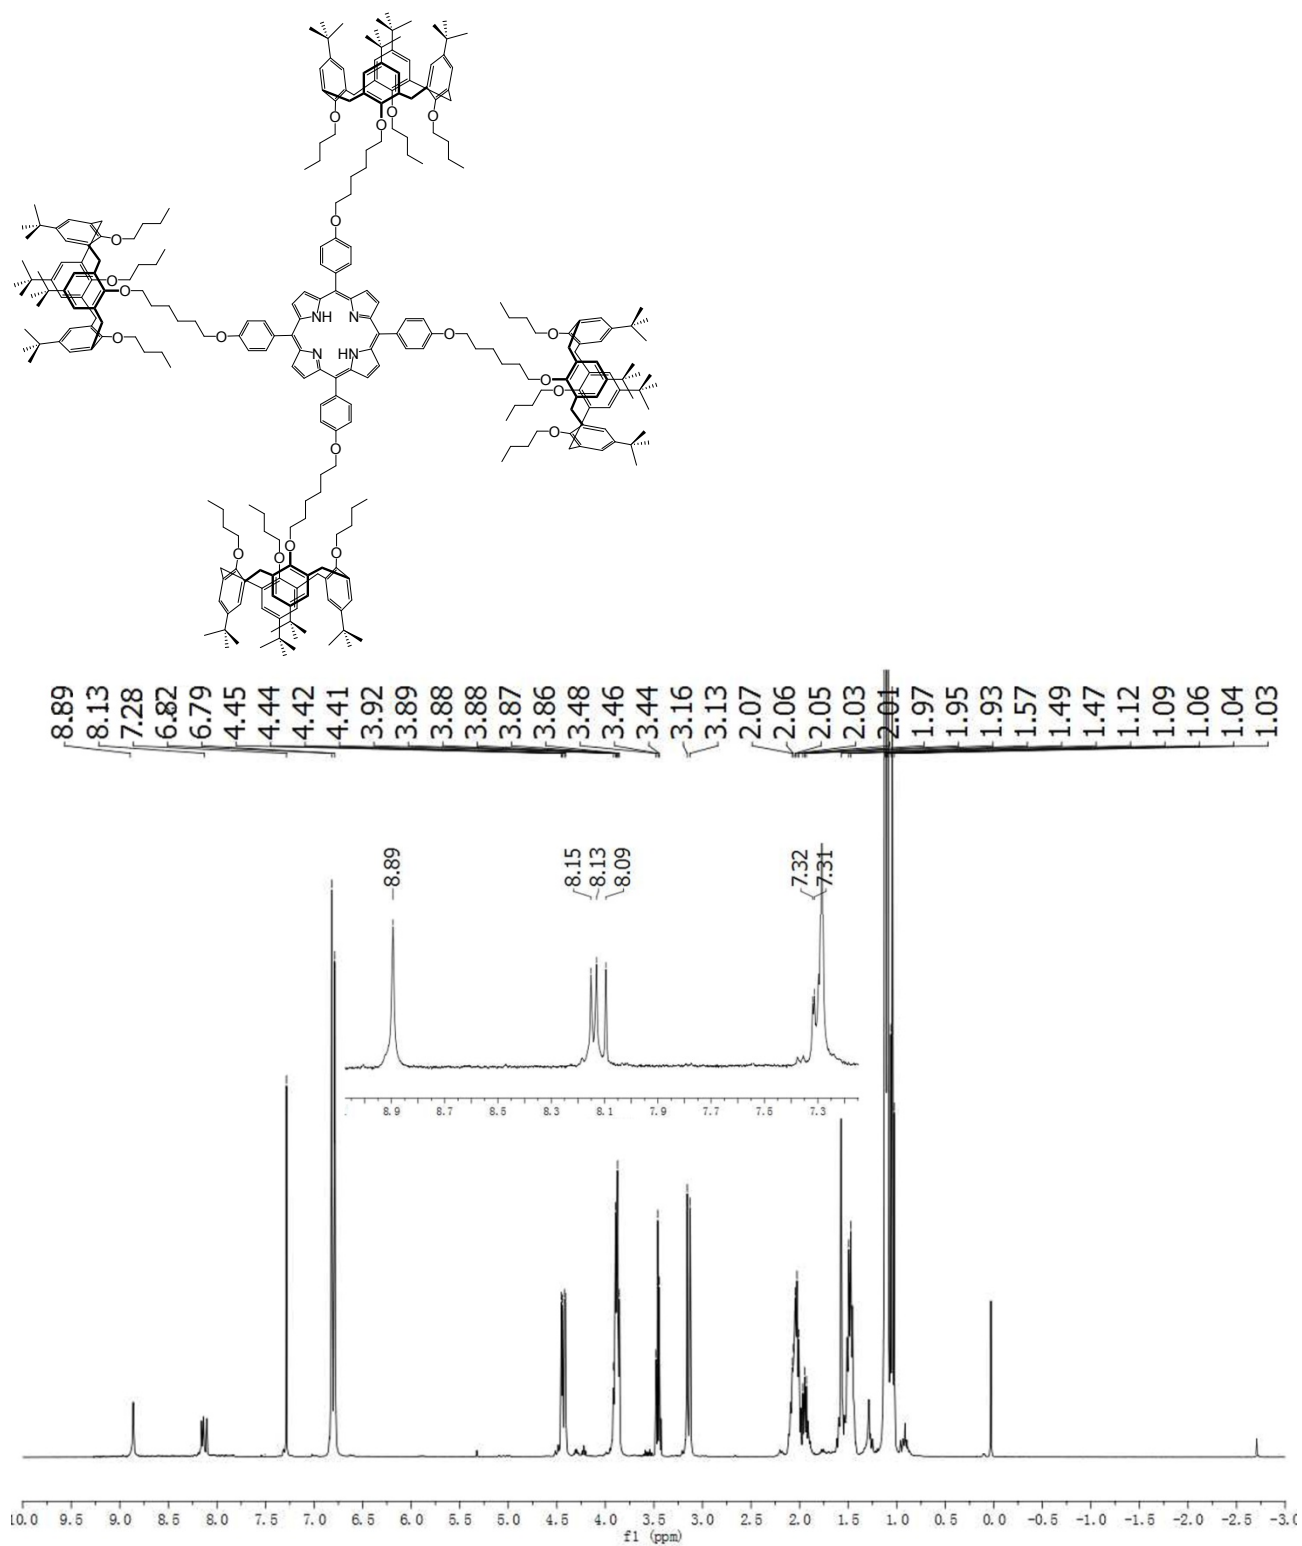

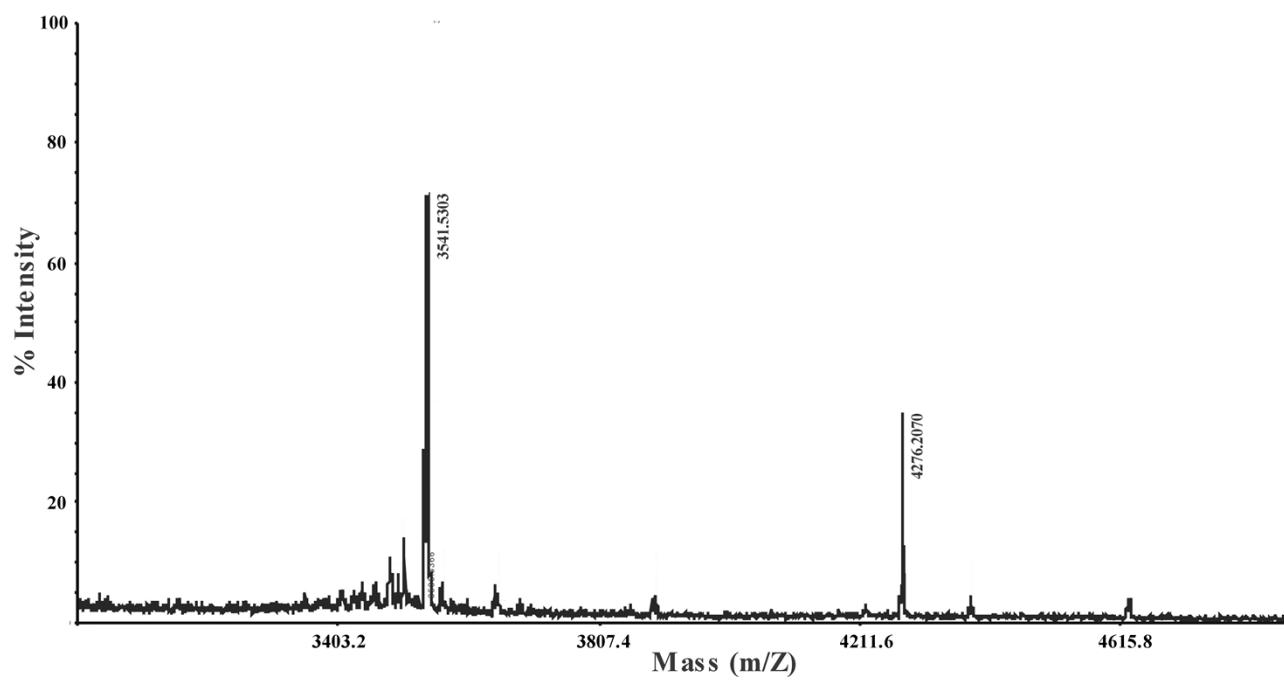

Supplement: c3ra48064j1.pdf [file c3ra48064j1.pdf]
